# Supplementary material for: Regioselectivity of the coupling between radicals and ambident nucleophiles. A theoretical study
Source: Royal Society of Chemistry journal article supplement (doi:10.1039/b710998a), 2008-01-01
Supplement: b710998a.pdf [file b710998a.pdf]

# Regioselectivity of the Coupling Between Radicals and Ambident Nucleophiles. A Theoretical Study.

María T. Baumgartner,\*<sup>a</sup> Guillermo A. Blanco and Adriana B. Pierini

INFIQC, Departamento de Química Orgánica, Facultad de Ciencias Químicas. Universidad Nacional de Córdoba. Ciudad Universitaria. 5000 Córdoba. Argentina.

## Supplementary information

|                                                                                                                                                                                                                 |    |
|-----------------------------------------------------------------------------------------------------------------------------------------------------------------------------------------------------------------|----|
| Figure S1: AM1 conformational search for RAs formed by reaction of phenyl radical ( <b>10</b> ) at the C <sub>1</sub> and O sites of anion <b>2</b> .                                                           | S2 |
| Table S1: $\Delta E_{\text{solv}}$ (kcal/mol) in methanol for the coupling of aromatic and aliphatic radicals with the nucleophiles of Chart 1.                                                                 | S3 |
| Figure S2: Gas phase B3LYP electrostatic potential and spin distribution for radical anions and transition states formed by reaction of phenyl radical at the C <sub>1</sub> and O sites of anion <b>2</b> .    | S4 |
| Figure S3: Charge distribution for the radical anions formed by reaction of phenyl radical at heteroatom and C positions of anions <b>1</b> , <b>5</b> and <b>8</b> .                                           | S5 |
| Table S2: AM1 SOMO for RAs                                                                                                                                                                                      | S6 |
| Figure S4: Gas phase B3LYP electrostatic potential and spin distribution for radical anions and transition states formed by reaction of radical <b>11</b> at the C <sub>1</sub> and O sites of anion <b>1</b> . | S7 |
| Figure S5: Gas phase B3LYP electrostatic potential and spin distribution for radical anions and transition states formed by reaction of radical <b>12</b> at the C <sub>1</sub> and O sites of anion <b>1</b> . | S8 |
| Table S3: Energy differences between relevant points of the potential energy surface (PES) for the reaction of phenyl radicals ( <b>10</b> ) with anion <b>2</b> calculated with different bases set.           | S9 |

**Figure S1:** AM1 conformational search for RAs formed by reaction of phenyl radical (**10**) at the C<sub>1</sub> and O sites of anion **2**.

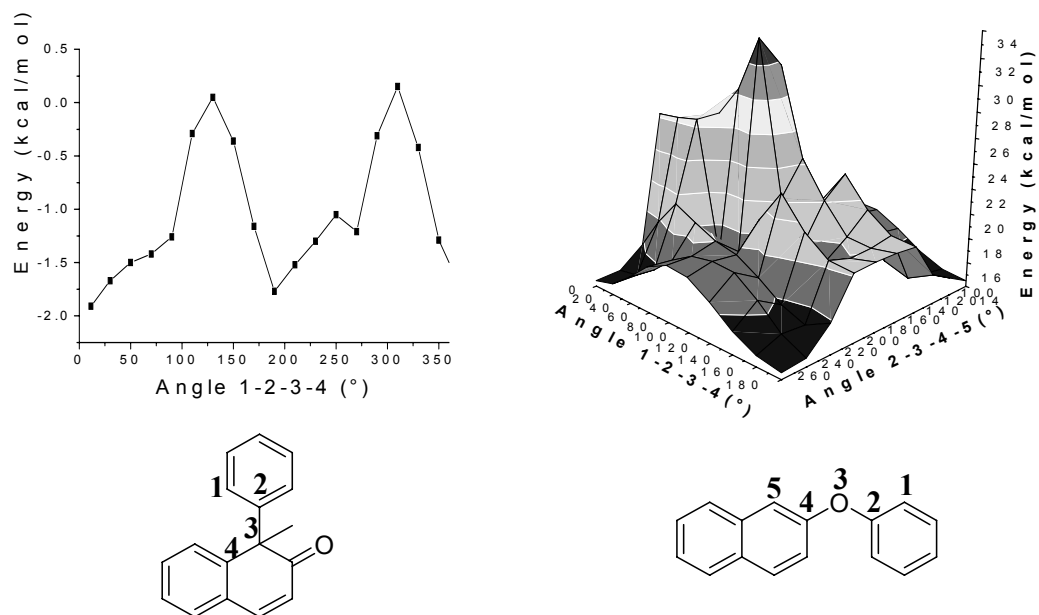

**Table S1:**  $\Delta E_{\text{solv}}$  (kcal/mol) in methanol for the coupling of aromatic and aliphatic radicals with the nucleophiles of Chart 1.

| Anion    | Posit          | $\Delta E^a$ with <b>10</b> |         |         | $\Delta E$ with <b>11</b> <sup>a</sup> |         |         | $\Delta E$ with <b>12</b> <sup>a</sup> |         |         |
|----------|----------------|-----------------------------|---------|---------|----------------------------------------|---------|---------|----------------------------------------|---------|---------|
|          |                | React <sup>b</sup>          | RA      | TS      | React <sup>c</sup>                     | RA      | TS      | React <sup>d</sup>                     | RA      | TS      |
| <b>1</b> | C <sub>2</sub> |                             |         |         | -150.28                                | -119.89 | -107.12 | -146.15                                | -120.47 | -111.66 |
|          | O              |                             |         |         |                                        | -129.06 | -106.66 |                                        | -129.42 | -105.74 |
| <b>2</b> | C <sub>1</sub> | -130.10                     | -111.17 | -111.50 |                                        |         |         |                                        |         |         |
|          | O              |                             | -101.95 | -103.07 |                                        |         |         |                                        |         |         |
| <b>6</b> | C <sub>5</sub> | -139.80                     | -132.78 | -125.81 |                                        |         |         |                                        |         |         |
|          | N              |                             | -119.40 | -112.83 |                                        |         |         |                                        |         |         |
| <b>7</b> | C <sub>2</sub> | -142.98                     | -123.40 | -116.87 |                                        |         |         |                                        |         |         |
|          | C <sub>3</sub> |                             | -122.15 | -117.61 |                                        |         |         |                                        |         |         |
|          | N              |                             | -106.61 | -111.98 |                                        |         |         |                                        |         |         |
| <b>8</b> | C <sub>2</sub> |                             |         |         | -159.72                                | -133.38 | -109.78 |                                        |         |         |
|          | C <sub>4</sub> |                             |         |         |                                        | -130.97 | -112.47 |                                        |         |         |
|          | N              |                             |         |         |                                        | -133.46 | -120.61 |                                        |         |         |

<sup>a</sup>  $\Delta E$  (kcal/mol) = Energies of RA (TS) in solvent - Energies of RA (TS) in gas phase.

<sup>b</sup>  $\Delta E$  phenyl radical **10** = - 6.56 kcal/mol.

<sup>c</sup>  $\Delta E$  4-nitrobenzyl radical **11** = - 19.09 kcal/mol.

<sup>d</sup>  $\Delta E$  4-nitrophenyl radical **12** = - 14.95 kcal/mol.

**Figure S2:** Gas phase B3LYP electrostatic potential (from red (negative) to blue (positive)) and spin distribution for radical anions and transition states formed by reaction of phenyl radical (**10**) at the C<sub>1</sub> and O sites of anion **2**.

Electrostatic potential

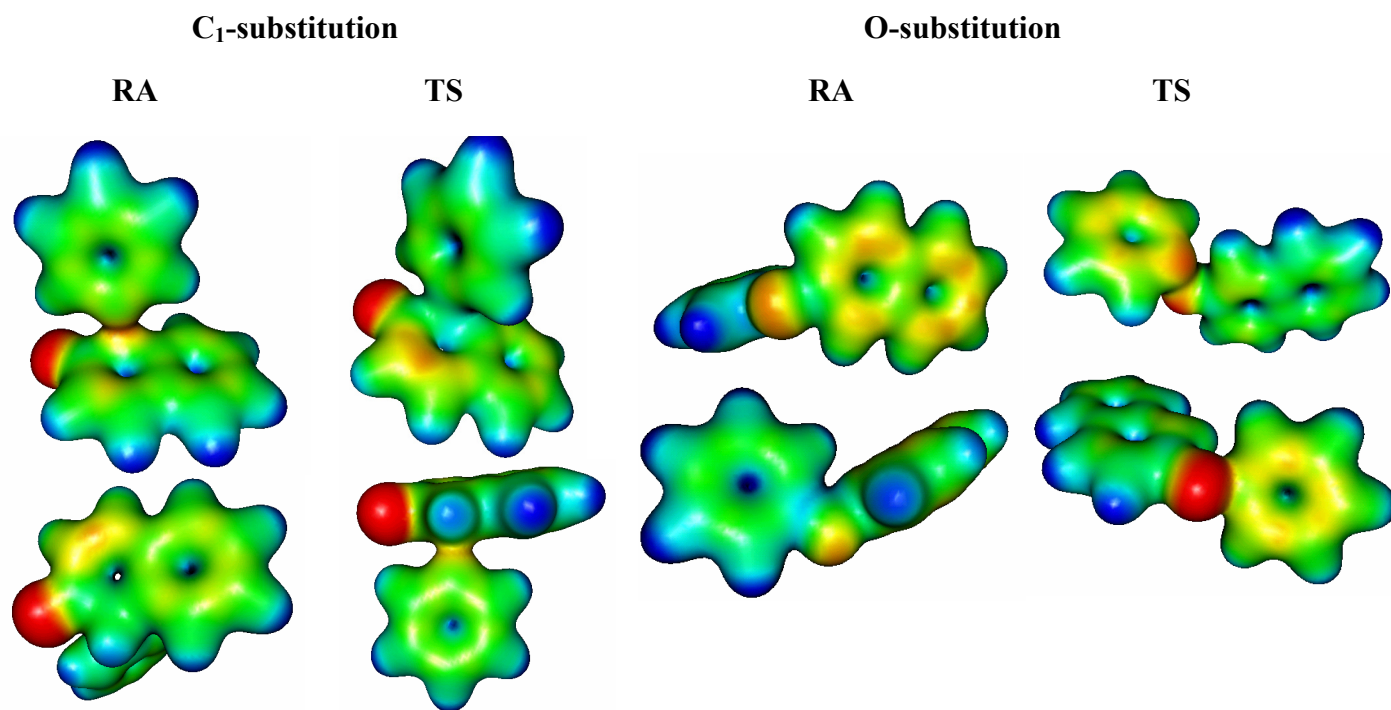

Spin distribution

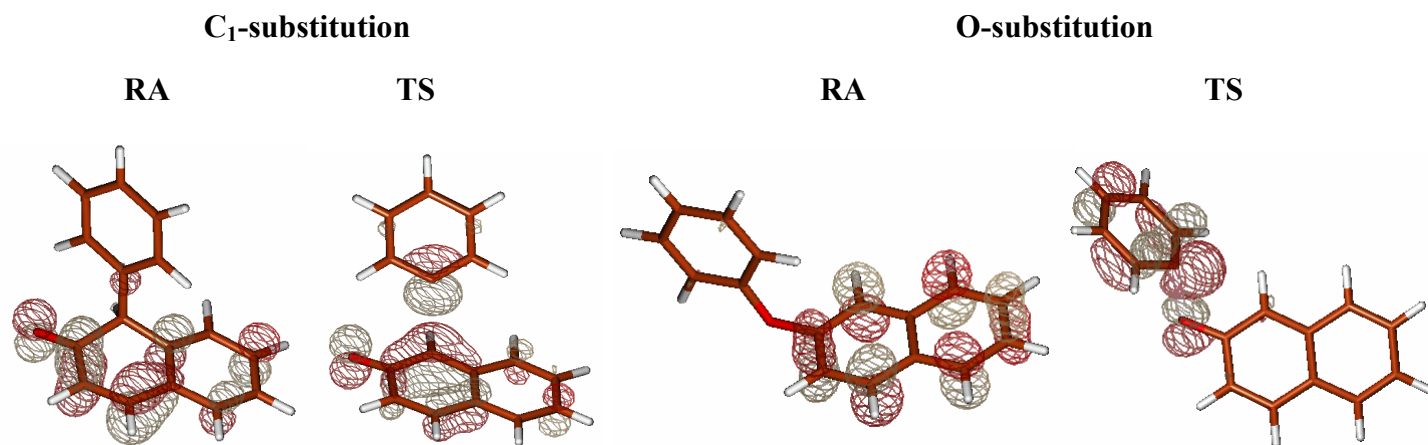

**Figure S3:** Charge distribution for the radical anions formed by reaction of phenyl radical (**10**) at heteroatom and C positions of anions **1**, **5** and **8**.

Anion 1

O-substitution

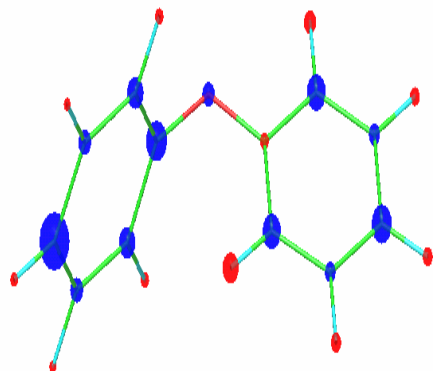

C<sub>1</sub>-substitution

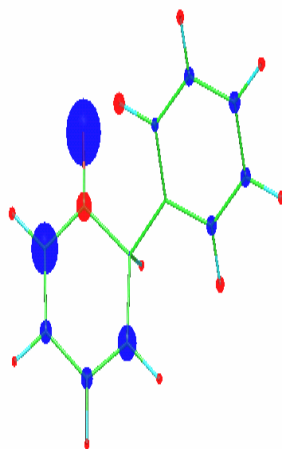

Anion 5

N-substitution

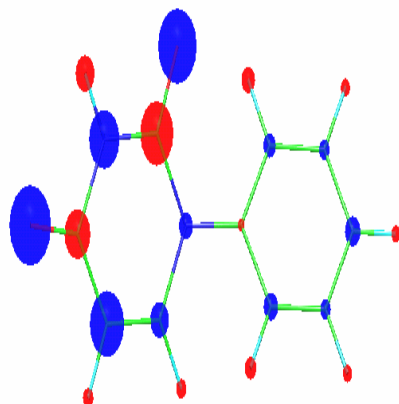

C<sub>5</sub>-substitution

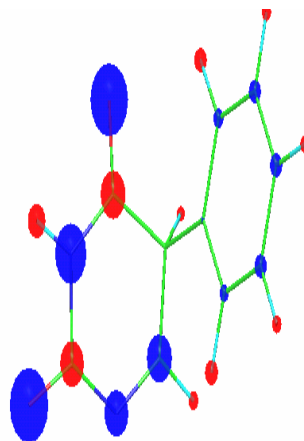

Anion 8

N-substitution

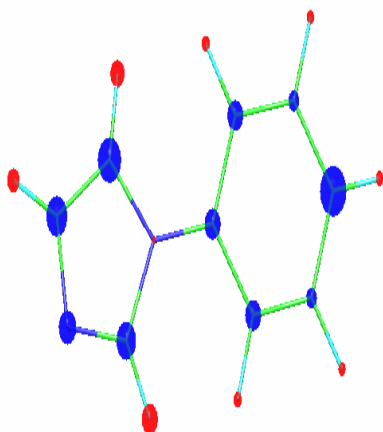

C<sub>2</sub>-substitution

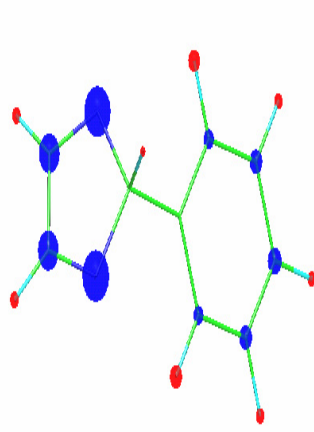

C<sub>4</sub>-substitution

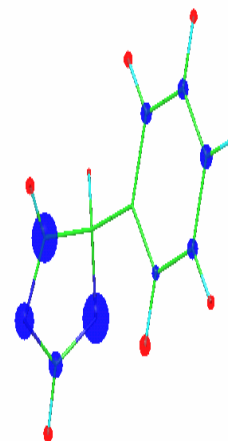

**Table S2:** AM1 SOMO for RAs

| Anion    | Position <sup>a</sup> | RAs of <b>10</b> | RAs of <b>11</b> |
|----------|-----------------------|------------------|------------------|
| <b>1</b> | C <sub>2</sub>        | -2.175951        | -2.674606        |
|          | O                     | -1.384733        | -2.694593        |
| <b>3</b> | C <sub>1</sub>        | -2.449492        | -2.659505        |
|          | C <sub>3</sub>        | -2.808059        | -3.047611        |
|          | O                     | -1.963007        | -2.746072        |
| <b>5</b> | C <sub>5</sub>        | -2.781553        | -3.003690        |
|          | N                     | -2.328421        | -3.121256        |
| <b>8</b> | C <sub>2</sub>        | -1.770456        | -2.523271        |
|          | C <sub>4</sub>        | -1.876079        | -2.754480        |
|          | N                     | -1.612966        | -2.913055        |
| <b>9</b> | C <sub>2</sub>        | -2.764304        | -2.991464        |
|          | N                     | -1.933987        | -3.000483        |

**Figure S4:** Gas phase B3LYP electrostatic potential (from red (negative) to blue (positive)) and spin distribution for radical anions and transition states formed by reaction of radical **11** at the C<sub>1</sub> and O sites of anion **1**.

Electrostatic potential

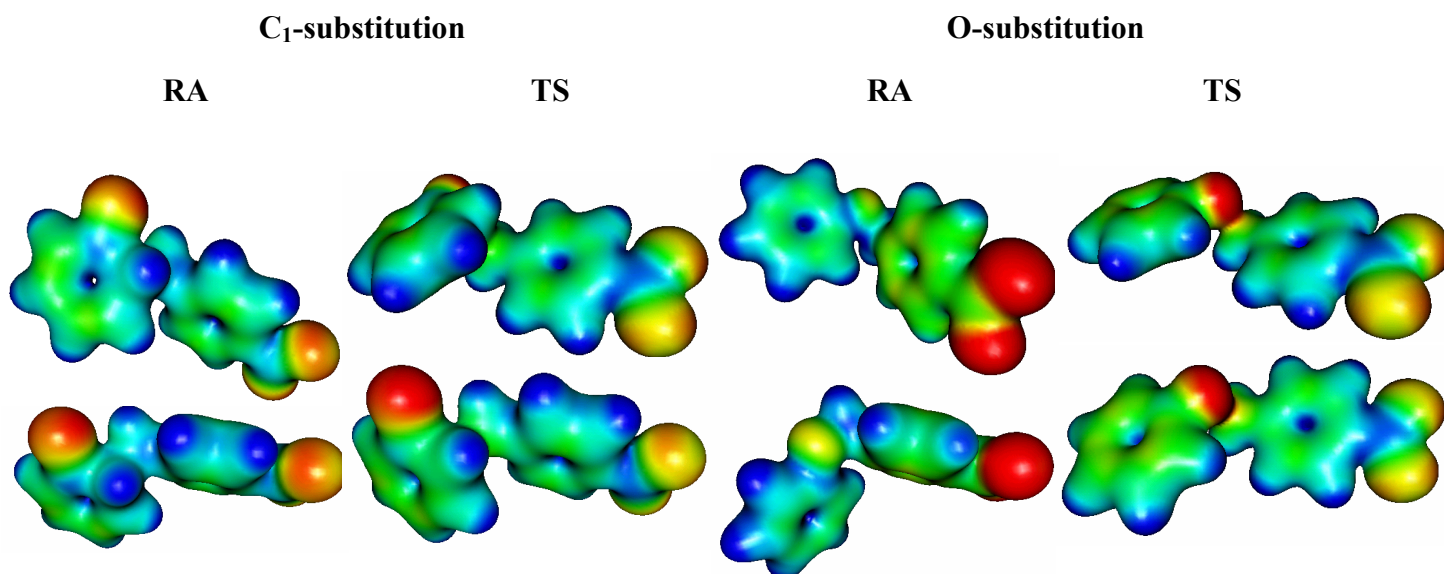

Spin distribution

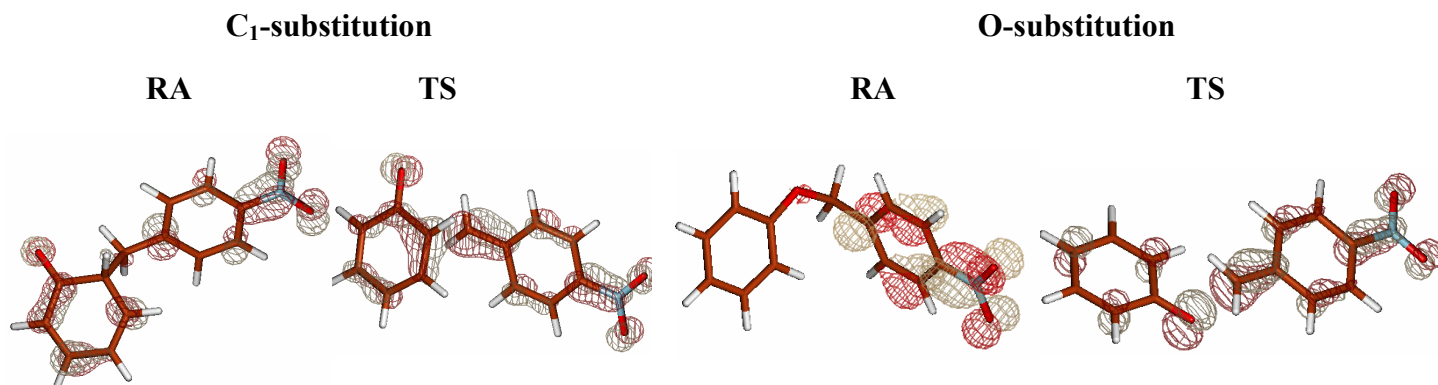





**Table S3:** Energy differences between relevant points of the potential energy surface (PES) for the reaction of phenyl radicals (**10**) with anion **2** calculated with different bases set.

| Bases set                         | C <sub>1</sub> -substitution |                              | O-substitution              |                              |                 |                  |
|-----------------------------------|------------------------------|------------------------------|-----------------------------|------------------------------|-----------------|------------------|
|                                   | E <sub>a</sub> <sup>a</sup>  | ΔE <sub>r</sub> <sup>b</sup> | E <sub>a</sub> <sup>a</sup> | ΔE <sub>r</sub> <sup>b</sup> | ΔE <sub>a</sub> | ΔΔE <sub>r</sub> |
| 6-31 G*                           | -8.01                        | -39.58                       | -1.66                       | -24.84                       | 6.35            | 14.74            |
| 6-31+ G*                          | -4.96                        | -36.34                       | 2.94                        | -19.91                       | 7.90            | 16.99            |
| 6-31 G*                           | 10.57                        | -20.61                       | 25.36                       | 3.31                         | 14.79           | 23.91            |
| Continuum<br>solvent <sup>c</sup> |                              |                              |                             |                              |                 |                  |
| 6-31+ G*                          | 6.15                         | -24.74                       | 27.66                       | 17.21                        | 21.51           | 41.95            |
| Continuum<br>solvent <sup>c</sup> |                              |                              |                             |                              |                 |                  |

<sup>a</sup>E<sub>a</sub> (kcal/mol) = energy difference between transition states and reactants (anion + phenyl radical). <sup>b</sup>ΔE<sub>r</sub> (kcal/mol) = reaction energy (energy difference between radical anion of product and reactants).

<sup>c</sup>Continuum solvent model for methanol, without geometry optimization. Differences in total solution phase energies informed.
